# Supplementary material for: Conservative Treatment of Interstitial Ectopic Pregnancy with the Combination of Mifepristone and Methotrexate: Our Experience and Review of the Literature
Source: Hindawi journal article supplement (doi:10.1155/2020/8703496), 2020-01-01
Supplement: f1 [file 8703496.f1.pdf]

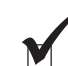

| Topic                               | Item       | Checklist item description                                                                             | Reported on Line                                                    |
|-------------------------------------|------------|--------------------------------------------------------------------------------------------------------|---------------------------------------------------------------------|
| <b>Title</b>                        | <b>1</b>   | The diagnosis or intervention of primary focus followed by the words “case report”                     | lines 1-2 ; pag. 1                                                  |
| <b>Key Words</b>                    | <b>2</b>   | 2 to 5 key words that identify diagnoses or interventions in this case report, including "case report" | line 31; pag. 2                                                     |
| <b>Abstract<br/>(no references)</b> | <b>3a</b>  | Introduction: What is unique about this case and what does it add to the scientific literature?        | lines 14-15; pag. 1                                                 |
|                                     | <b>3b</b>  | Main symptoms and/or important clinical findings                                                       | lines 17-19 pag.1                                                   |
|                                     | <b>3c</b>  | The main diagnoses, therapeutic interventions, and outcomes                                            | lines from 19 to 22; pag. 1                                         |
|                                     | <b>3d</b>  | Conclusion—What is the main “take-away” lesson(s) from this case?                                      | lines 26-27; pag.1                                                  |
| <b>Introduction</b>                 | <b>4</b>   | One or two paragraphs summarizing why this case is unique ( <b>may include references</b> )            | lines from 40 to 46; pag.2                                          |
| <b>Patient Information</b>          | <b>5a</b>  | De-identified patient specific information.                                                            | CASE1 lines 51 ;pag 3 /CASE2 line 66 pag.3                          |
|                                     | <b>5b</b>  | Primary concerns and symptoms of the patient.                                                          | CASE1 lines from 52 to 57; pag.3 /CASE2 lines 67-71 ; pag.3         |
|                                     | <b>5c</b>  | Medical, family, and psycho-social history including relevant genetic information                      | CASE1 lines 51-52 pag.3 /CASE2 lines 66 ; pag.3                     |
|                                     | <b>5d</b>  | Relevant past interventions with outcomes                                                              | CASE1 lines 51-52 pag.3 /CASE2 lines 66 ; pag.3                     |
| <b>Clinical Findings</b>            | <b>6</b>   | Describe significant physical examination (PE) and important clinical findings.                        | CASE1 lines from 51 to 57; pag.3 /CASE2 lines 67to 71; pag.3        |
| <b>Timeline</b>                     | <b>7</b>   | Historical and current information from this episode of care organized as a timeline                   | N/A                                                                 |
| <b>Diagnostic<br/>Assessment</b>    | <b>8a</b>  | Diagnostic testing (such as PE, laboratory testing, imaging, surveys).                                 | CASE1 lines from 51 to 57; pag.3 /CASE2 lines 67to 71; pag.3        |
|                                     | <b>8b</b>  | Diagnostic challenges (such as access to testing, financial, or cultural)                              | N/A                                                                 |
|                                     | <b>8c</b>  | Diagnosis (including other diagnoses considered)                                                       | CASE1 line 54-56; pag. 3 /CASE2 line 68 to 71 ; pag 3               |
|                                     | <b>8d</b>  | Prognosis (such as staging in oncology) where applicable                                               | N/A                                                                 |
| <b>Therapeutic<br/>Intervention</b> | <b>9a</b>  | Types of therapeutic intervention (such as pharmacologic, surgical, preventive, self-care)             | CASE1 lines 59 to 62 pag.3/ CASE2 lines 72-78; pag.3                |
|                                     | <b>9b</b>  | Administration of therapeutic intervention (such as dosage, strength, duration)                        | CASE1 lines 59 to 62 pag.3/ CASE2 lines 72-78; pag.3                |
|                                     | <b>9c</b>  | Changes in therapeutic intervention (with rationale)                                                   | N/A                                                                 |
| <b>Follow-up and<br/>Outcomes</b>   | <b>10a</b> | Clinician and patient-assessed outcomes (if available)                                                 | CASE1 lines 64-65 pag.3/ CASE2 lines 79 to 81; pag.3                |
|                                     | <b>10b</b> | Important follow-up diagnostic and other test results                                                  | CASE1 lines from 61 to 65 pag.3/ CASE2 lines from 74 to 81 pag 3-4  |
|                                     | <b>10c</b> | Intervention adherence and tolerability (How was this assessed?)                                       | N/A                                                                 |
|                                     | <b>10d</b> | Adverse and unanticipated events                                                                       | N/A                                                                 |
| <b>Discussion</b>                   | <b>11a</b> | A scientific discussion of the strengths AND limitations associated with this case report              | N/A                                                                 |
|                                     | <b>11b</b> | Discussion of the relevant medical literature <b>with references</b> .                                 | lines from 98 to 153; pag. 4 to 6; lines from 166 to 186 pag 7      |
|                                     | <b>11c</b> | The scientific rationale for any conclusions (including assessment of possible causes)                 | lines from 153 to 165; pag. 6                                       |
|                                     | <b>11d</b> | The primary “take-away” lessons of this case report (without references) in a one paragraph conclusion | lines from 188 to 198; pag. 7-8                                     |
| <b>Patient Perspective</b>          | <b>12</b>  | The patient should share their perspective in one to two paragraphs on the treatment(s) they received  | N/A                                                                 |
| <b>Informed Consent</b>             | <b>13</b>  | Did the patient give informed consent? Please provide if requested                                     | Yes <input checked="" type="checkbox"/> No <input type="checkbox"/> |
